# Supplementary material for: High-throughput proteo-genomic identification of functional endothelial cell microproteins encoded by non-canonical small open reading frames
Source: Research Square preprint supplement (doi:10.21203/rs.3.rs-4194943/v1), 2024-04-09
Supplement: Supplementary file 1 [file a123137761c859c263b8b13a.xlsx]

## Sheet: Sheet1
Type and Unit
Female Gender n (%), [n]
All
Age mean ± SD, [years]
CVRF
Arterial Hypertension n (%),	[n]
	(IQR), [kg/m2]
Characteristics TASH patients	Type and Unit	Data availability	n = 8
Female Sex	n (%), [n]	8 / 8	5 (62.5)
Age	mean ± SEM, [years]	8 / 8	62.26 ± 4.79
Arterial Hypertension	n (%), [n]	8 / 8	7 (87.5)
Dyslipidemia	n (%), [n]	8 / 8	6 (75)
Diabetes Mellitus	n (%), [n]	8 / 8	3 (37.5)
Body Mass Index	median (IQR), [kg/m2]	8 / 8	26.12 (24.41−31.77)
Smoking	n (%), [n]	5 / 8	5 (100)
Fam. History	n (%), [n]	3 / 8	1 (33.33)
Betablocker	n (%), [n]	8 / 8	6 (75)
ACE Inhibitor	n (%), [n]	8 / 8	4 (50)
ASS=aspirin??	n (%), [n]	8 / 8	5 (62.5)
Statin	n (%), [n]	8 / 8	3 (37.5)
eGFR	mean ± SEM, [ml/min/1, 73m2]	8 / 8	90.7 ± 14.94
Creatinine	mean ± SEM, [mg/dl]	8 / 8	0.89 ± 0.12
Left ventricle ejection fraction (general)	mean ± SEM, [%]	7 / 8	55 ± 0
