# Supplementary material for: High-throughput proteo-genomic identification of functional endothelial cell microproteins encoded by non-canonical small open reading frames
Source: Research Square preprint supplement (doi:10.21203/rs.3.rs-4194943/v1), 2024-04-09
Supplement: Supplementary file 2 [file e422f8db52fe4f0245ef6296.xlsx]

## Sheet: Tabelle1
			clinical parameters			CV risk factors				comorbidities						body status			medication			histological evaluation
																						Classification (AHA)	Stability (yes/no)	Rupture (yes/no; yes?-probably yes)	Calcification		Collagen (scale 0 to 3)	Elastin (scale 0 to 3)	Cellularity (scale 0 to 3)	Infiltrates (scale 0 to 3)	Neo vessels (scale 0 to 3)
Patient	Age	Gender (male, female)	Symptoms (asymptomatic-a/symptomatic-s)	Symptom (if s)	degree of stenosis (sono)	Hypertension	Diabetes	Nicotine	Dyslipidemia	CAD	MI (myocardial infarction)	AF (atrial fibrillation)	PAD	COPD	Dialysis	Height (cm)	Weight (Kg)	BMI	PFI (platelet function inhibitors)	Statins	Insulin				amount (scale 0 to 3)	Phase (early/advanced)
1	82	m	s	TIA	85	yes	yes	ex	yes	yes	no	no	no	yes	no	176	75	24.2123	yes	yes	no	VI/VII	no	yes	1.5	a	2	1	0.5	0.5	2
2	75	m	a	-	80	yes	yes	ex	yes	yes	yes	no	no	no	no	173	97	32.41	yes	yes	no	VI	no	no	-	-	1.5	1.5	0.5	0.2	0.5
3	86	m	s	ischemic stroke	90	yes	no	no	no	yes	yes	no	no	no	no	161	63	24.3046	yes	no	no	VI	yes	no	-	-	1	0.5	1	0.5	0.2
4	64	m	a	-	90	yes	no	ex	yes	no	no	no	no	no	no	187	82	23.4493	yes	yes	no	VII	yes	no	1	a	3	1	2.5	2.5	2
5	71	m	a	-	75	yes	no	ex	yes	yes	no	no	no	no	no	183	92	27.4717	yes	no	no	VI/VII	no	yes?	0.5	a	1.5	0.5	1.5	1.5	1.5
6	72	f	a	-	80	yes	no	no	no	no	no	no	no	no	no	169	82	28.7105	yes	yes	no	VI	no	no	0.5	a	2.5	1	1	1	1
7	65	m	a	-	70	yes	no	yes	yes	no	no	no	yes	no	no	173	88	29.4029	yes	yes	no	VI	yes	yes	1	a	0.2	0.2	2	1.5	1.5
8	58	m	a	-	90	yes	no	ex	yes	yes	no	no	no	no	no	181	110	33.5765	yes	yes	no	V	no	no	0.5	a	1.5	0.5	3	2	2
9	73	m	s	ischemic stroke	80	yes	no	no	no	no	no	no	no	no	no	170	73	25.2595	yes	no	no	VI	yes	no	-	-	3	1	1	0.2	0.2
10	88	f	a	-	90	yes	no	no	yes	no	no	no	no	no	no	160	43	16.7969	yes	yes	no	VI	no	yes	1	a	1	0.5	1	0.5	0.2
11	78	f	a	-	90	yes	no	ex	yes	no	no	no	no	no	no	150	68	30.2222	yes	yes	no	VI/VII	yes	no	1	a	1.5	1	0.2	0.2	0.5
